# Supplementary material
Source: publisher figshare collection journal article supplement (https://gsajournals.figshare.com/ndownloader/files/18002594)
Supplement: Supplementary file 1 [file 18002594]

| **Table S1 *Saccharomyces cerevisiae* strains used in this study** | | |  |
| --- | --- | --- | --- |
| Strain | *Genotype* | | | Piccirillo et al (2010a) |
|  |  |  | |
| **SH3826, SH5867** | *MATa / MAT ade2 / ade2 can1:ADE2:CAN1 / can1:ADE2:CAN1 his3-11,15 / his3-11,15 LEU2 / leu2-3,112 lys2(3'del):HIS3:lys2(5'del) / LYS2 TRP1 / trp1-3' ura3-1 / ura3-1 IME1+ / prIME1-LacZ(URA3)* | Piccirillo et al 2010 | |
| **SH3830, SH5900** | *MATa / MAT ade2 / ade2 can1:ADE2:CAN1 / can1:ADE2:CAN1 his3-11,15 / his3-11,15 LEU2+ / leu2-3,112 lys2(3'del):HIS3:lys2(5'del) / LYS2 TRP1 / trp1-3' ura3-1 / ura3-1 ime1/ prIME1-LacZ(URA3)* | “ | |
| **SH3881, SH3882** | *MAT***a***/MATα ade2/ade2 can1:ADE2:CAN1/can1:ADE2:CAN1 his3-11,15/his3-11,15 LEU2 / LEU2 lys2(3'∆):HIS3:lys2(5'∆)/LYS2 TRP1 / TRP1 URA3/ura3-1* | “ | |
| **SH3883, SH3884** | *MAT***a***/MATα ade2/ade2 can1:ADE2:CAN1/can1:ADE2:CAN1 his3-11,15/his3-11,15 leu2-3,112 / leu2-3,112 lys2(3'∆):HIS3:lys2(5'∆)/LYS2 TRP1 / TRP1 URA3/ura3-1 ime2:LEU2ime2:LEU2* | “ | |
| **SH3972, SH5484** | *MATa / MAT ade2 / ade2 can1:ADE2:CAN1 / can1:ADE2:CAN1 his3-11,15 / his3-11,15 LEU2+ / leu2-3,112 lys2(3'del):HIS3:lys2(5'del) / LYS2 TRP1 / trp1-3' ura3-1 / URA3+ ime1ime1* | | “ |
| **SH4375, SH4376, SH4377** | *MATa / MAT ade2 / ade2 can1:ADE2:CAN1 / can1:ADE2:CAN1 his3-11,15 / his3-11,15 LEU2 / LEU2 lys2(3'del):HIS3:lys2(5'del) / LYS2 TRP1 / TRP1 ura3-1 / ura3-1 rim101::URA3 / rim101::URA3* | | “ |
| **SH4379, SH4378** | *MATa / MAT ade2 / ade2 can1:ADE2:CAN1 / can1:ADE2:CAN1 his3-11,15 / his3-11,15 leu2-3,112 / leu2-3,112 lys2(3'del):HIS3:lys2(5'del) / LYS2 trp1-1 / trp1-3' ura3-1 / ura3-1 ime2-LacZ:TRP1/ ime2:LEU2-rim101::URA3 / rim101::URA3* | | “ |
| **SH4414, SH5225** | *MATa / MAT ade2 / ade2 can1:ADE2:CAN1 / can1:ADE2:CAN1 his3-11,15 / his3-11,15 LEU2 / LEU2 lys2(3'del):HIS3:lys2(5'del) / LYS2 trp1-1 / TRP1 ura3-1 / ura3-1 ime1 / prIME1-mCherry (URA3)* | Piccirillo et al 2015 | |
| **SH4563, SH4564** | *MATa / MAT ade2 / ade2 can1:ADE2:CAN1 / can1:ADE2:CAN1 his3-11,15 / his3-11,15 LEU2 / LEU2 lys2(3'del):HIS3:lys2(5'del) / LYS2 TRP1/ trp1-3' ura3-1 / ura3-1 1 ime1/ ime1rim101URA3 / rim101URA3* | This study | |
| **SH4652, SH5982** | *MATa / MAT ade2 / ade2 can1:ADE2:CAN1 / can1:ADE2:CAN1 his3-11,15 / his3-11,15 leu2-3,112 / LEU2 lys2(3'del):HIS3:lys2(5'del) / LYS2 trp1-1 / TRP1 ura3-1 / ura3-1 IME1 / prIME1-mCherry-URA3* | “ | |
| **SH4708, SH4767** | *MATa / MAT ade2 / ade2 can1:ADE2:CAN1 / can1:ADE2:CAN1 his3-11,15 / his3-11,15 LEU2 / LEU2 lys2(3'del):HIS3:lys2(5'del) / LYS2 TRP1/ TRP1 ura3-1 / ura3-1 rlm1URA3 / rlm1URA3* | Piccirillo et al 2015 | |
| **SH4799, SH5175** | *MATa / MATade2 / ade2 can1:ADE2:CAN1 / can1:ADE2:CAN1 his3-11,15 / his3-11,15 LEU2 / leu2-3,112 lys2(3'del):HIS3:lys2(5'del) / LYS2 TRP1+ / trp1-3' ura3-1 / ura3-1 rlm1URA3 / rlm1 LEU2 IME1/ prIME1-LacZ(URA3)* | “ | |
| **SH4800, SH5174** | *MATa / MAT ade2 / ade2 can1:ADE2:CAN1 / can1:ADE2:CAN1 his3-11,15 / his3-11,15 leu2-3,112 / leu2-3,112 lys2(3'del):HIS3:lys2(5'del) / LYS2 TRP1+ / trp1-3' ura3-1 / ura3-1 ime1/ prIME1-LacZ(URA3) rlm1LEU2 rlm1LEU2* | “ | |
| **SH4805, SH5071** | *MATa / MAT ade2 / ade2 can1:ADE2:CAN1 / can1:ADE2:CAN1 his3-11,15 / his3-11,15 leu2-3,112 / leu2-3,112 lys2(3'del):HIS3:lys2(5'del) / LYS2 TRP1 / trp1-3' URA3 / ura3-1 ime2LEU2/ ime2GFPTRP1* | | “ |
| **SH4967, SH4968** | *MATa / MAT ade2 / ade2 can1:ADE2:CAN1 / can1:ADE2:CAN1 his3-11,15 / his3-11,15 leu2-3,112 / leu2-3,112 lys2(3'del):HIS3:lys2(5'del) / LYS2 TRP1 / trp1-3' ura3-1 / ura3-1 rlm1::LEU / rlm1::LEU ime1 / prIME1-mCherry-URA3* | | “ |
| **SH5069, SH5107** | *MATa / MAT ade2 / ade2 can1:ADE2:CAN1 / can1:ADE2:CAN1 his3-11,15 / his3-11,15 leu2-3,112 / LEU2+ lys2(3'del):HIS3:lys2(5'del) / LYS2 TRP1 / trp1-3' ura3-1 / ura3-1* pS778 (UASRlm1-LacZ, *URA3)* | | This study |
| **SH5186, SH5880** | *MATa / MAT ade2 / ade2 can1:ADE2:CAN1 / can1:ADE2:CAN1 his3-11,15 / his3-11,15 leu2-3,112 / LEU2+ lys2(3'del):HIS3:lys2(5'del) / LYS2 TRP1 / trp1-3' ura3-1 / ura3-1 ime1ime1*pS778 (UASRlm1-LacZ, *URA3)* | | “ |
| **SH5225, SH4414** | *MATa / MAT ade2 / ade2 can1:ADE2:CAN1 / can1:ADE2:CAN1 his3-11,15 / his3-11,15 LEU2 / LEU2 lys2(3'del):HIS3:lys2(5'del) / LYS2 trp1-1 / TRP1 ura3-1 / ura3-1 ime1 / prIME1-mCherry (URA3)* | “ | |
| **SH5252, SH5840** | *MATa / MAT ade2 / ade2 can1:ADE2:CAN1 / can1:ADE2:CAN1 his3-11,15 / his3-11,15 LEU2 / leu2-3,112 lys2(3'del):HIS3:lys2(5'del) / LYS2 trp1-1 / trp1-3' ura3-1 / ura3-1 RLM+ / rlm1::LEU ime1/ prIME1-mCherry-URA3 RIM20-GFP-TRP1 / RIM20-GFP-TRP1* | | “ |
| **SH5312, SH5813** | *MATa / MAT ade2 / ade2 can1:ADE2:CAN1 / can1:ADE2:CAN1 his3-11,15 / his3-11,15 leu2-3,112 / leu2-3,112 lys2(3'del):HIS3:lys2(5'del) / LYS2 TRP1 / trp1-3' ura3-1 / ura3-1 ime1/ prIME1-LacZ(URA3) rim101LEU2 rim101LEU2* | | “ |
| **SH5408, SH5410** | *MATa / MAT ade2 / ade2 can1:ADE2:CAN1 / can1:ADE2:CAN1 his3-11,15 / his3-11,15 / leu2-3,112 / LEU2+ lys2(3'del):HIS3:lys2(5'del) / LYS2 TRP1 / trp1-3' ura3-1 / ura3-1 ime1ime1*pS778 (UASRlm1-LacZ, *URA3)* | | “ |
| **SH5420** | *MATa / MAT ade2 / ade2 can1:ADE2:CAN1 / can1:ADE2:CAN1 his3-11,15 / his3-11,15 LEU2 / leu2-3,112 lys2(3'del):HIS3:lys2(5'del) / LYS2 trp1-1 / trp1-3' ura3-1 / URA3 ime2*GFP*TRP1 /  ime2*GFP*TRP1.* | | “ |
| **SH5484, SH3972,** | *MATa / MAT ade2 / ade2 can1:ADE2:CAN1 / can1:ADE2:CAN1 his3-11,15 / his3-11,15 LEU2+ / leu2-3,112 lys2(3'del):HIS3:lys2(5'del) / LYS2 TRP1 / trp1-3' ura3-1 / URA3+ ime1ime1* | | “ |
| **SH5487, SH5892** | *MATa / MAT ade2 / ade2 can1:ADE2:CAN1 / can1:ADE2:CAN1 his3-11,15 / his3-11,15 leu2-3,112 / leu2-3,112 lys2(3'del):HIS3:lys2(5'del) / LYS2 TRP1 / trp1-3' ura3-1 / ura3-1 ime1ime1 rim101LEU2 / rim101LEU2* pS778 (UASRlm1-LacZ, *URA3)* | | “ |
| **SH5495, SH6170** | *MATa / MAT ade2 / ade2 can1:ADE2:CAN1 / can1:ADE2:CAN1 his3-11,15 / his3-11,15 leu2-3,112 / leu2-3,112 lys2(3'del):HIS3:lys2(5'del) / LYS2 TRP1 / trp1-3' ura3-1 / ura3-1 rlm1LEU2 / rlm1LEU2 slt2URA3 / slt2URA3* | | “ |
| **SH5507, SH5509** | *MATa / MAT ade2 / ade2 can1:ADE2:CAN1 / can1:ADE2:CAN1 his3-11,15 / his3-11,15 LEU2 / LEU2 lys2(3'del):HIS3:lys2(5'del) / LYS2 trp1-1 / trp1-3' ura3-1 / ura3-1 ime2*LacZ*TRP1/ ime2GFPTRP1 rlm1URA3 / rlm1URA3* | | “ |
| **SH5511, SH5513** | *MATa / MAT ade2 / ade2 can1:ADE2:CAN1 / can1:ADE2:CAN1 his3-11,15 / his3-11,15 leu2-3,112 / leu2-3,112 lys2(3'del):HIS3:lys2(5'del) / LYS2 trp1-1 / trp1-3' ura3-1 / ura3-1 ime2*LacZ*TRP1/ ime2GFPTRP1 rim101LEU2 / rim101LEU2 rlm1URA3 / rlm1URA3* | | “ |
| **SH5520, SH4429** | *MATa / MAT ade2 / ade2 can1:ADE2:CAN1 / can1:ADE2:CAN1 his3-11,15 / his3-11,15 LEU2 / LEU2 lys2(3'del):HIS3:lys2(5'del) / LYS2 TRP1/ TRP1 ura3-1 / ura3-1 slt2URA3 / slt2URA3* | “ | |
| **SH5543, SH5545** | *MATa / MAT ade2 / ade2 can1:ADE2:CAN1 / can1:ADE2:CAN1 his3-11,15 / his3-11,15 LEU2 / LEU2 lys2(3'del):HIS3:lys2(5'del) / LYS2 trp1-1 / trp1-3' ura3-1 / ura3-1 ime2*LacZ*TRP1/ ime2GFPTRP1 rim101URA3 / rim101URA3* | | “ |
| **SH5550, SH5702** | *MATa / MAT ade2 / ade2 can1:ADE2:CAN1 / can1:ADE2:CAN1 his3-11,15 / his3-11,15 leu2-3,112 / leu2-3,112 lys2(3'del):HIS3:lys2(5'del) / LYS2 TRP1/ trp1-3' ura3-1 / ura3-1 rim101URA3 / rim101URA3 rlm1LEU2 / rlm1LEU2* | “ | |
| **SH5721, SH5459** | *MATa / MAT ade2 / ade2 can1:ADE2:CAN1 / can1:ADE2:CAN1 his3-11,15 / his3-11,15 leu2-3,112 / leu2-3,112 lys2(3'del):HIS3:lys2(5'del) / LYS2 TRP1 / trp1-3' ura3-1 / ura3-1 ime1ime1rim101LEU2/ rim101LEU2* pS778 (UASRlm1-LacZ, *URA3)* | “ | |
| **SH5729, SH5805** | *MATa / MAT ade2 / ade2 can1:ADE2:CAN1 / can1:ADE2:CAN1 his3-11,15 / his3-11,15 leu2-3,112 / leu2-3,112 lys2(3'del):HIS3:lys2(5'del) / LYS2 TRP1 / trp1-3' ura3-1 / ura3-1 ime1/ prIME1-LacZ(URA3) rim101LEU2 rim101LEU2 rlm1LEU2 rlm1LEU2* | “ | |
| **SH5765, SH5764** | *MATa / MAT ade2 / ade2 can1:ADE2:CAN1 / can1:ADE2:CAN1 his3-11,15 / his3-11,15 leu2-3,112 / LEU2 lys2(3'del):HIS3:lys2(5'del) / LYS2 trp1-1 / trp1-3' URA3 / ura3-1 ime2*GFP*TRP1 /  ime2*GFP*TRP1 rim101LEU2/ rim101URA3* | “ | |
| **SH5768, SH5961** | *MATa / MAT ade2 / ade2 can1:ADE2:CAN1 / can1:ADE2:CAN1 his3-11,15 / his3-11,15 leu2-3,112 / leu2-3,112 lys2(3'del):HIS3:lys2(5'del) / LYS2 trp1-1 / trp1-3' ura3-1 / ura3-1 rlm1::LEU / rlm1::LEU ime1 / prIME1-mCherry-URA3 RIM20-GFP-TRP1 / RIM20-GFP-TRP1* | | “ |
| **SH5776, SH5778** | *MATa / MAT ade2 / ade2 can1:ADE2:CAN1 / can1:ADE2:CAN1 his3-11,15 / his3-11,15 leu2-3,112 / leu2-3,112 lys2(3'del):HIS3:lys2(5'del) / LYS2 trp1-1 / trp1-3' ura3-1 / ura3-1 ime2-*GFP (*TRP1*) */ ime2-*GFP (*TRP1*) Yep351(*LEU2*) pS778 (UASRlm1-LacZ, *URA3)* | | “ |
| **SH5797, SH5799** | *MATa / MAT ade2 / ade2 can1:ADE2:CAN1 / can1:ADE2:CAN1 his3-11,15 / his3-11,15 leu2-3,112 / leu2-3,112 lys2(3'del):HIS3:lys2(5'del) / LYS2 trp1-1 / trp1-3' ura3-1 / ura3-1 ime2-*GFP (*TRP1*) */ ime2-*GFP (*TRP1*)  *pS303 (2-IME1, LEU2) pS778 (UASRlm1-LacZ, URA3)* | | “ |
| **SH5830, SH5831** | *MATa / MAT ade2 / ade2 can1:ADE2:CAN1 / can1:ADE2:CAN1 his3-11,15 / his3-11,15 leu2-3,112 / leu2-3,112 lys2(3'del):HIS3:lys2(5'del) / LYS2 TRP1 / trp1-3' ura3-1 / ura3-1 prIME1* mCherry*(URA3)* / *ime1* (*pZPS1-LacZ*, *LEU2)* | “ | |
| **SH5838, SH5839** | *MATa / MAT ade2 / ade2 can1:ADE2:CAN1 / can1:ADE2:CAN1 his3-11,15 / his3-11,15 LEU2 / leu2-3,112 lys2(3'del):HIS3:lys2(5'del) / LYS2 trp1-1 / trp1-3' ura3-1 / ura3-1 rim101LEU2 / rim101LEU2 rlm1::LEU / RLM1 IME1 / prIME1-LacZ (URA3) RIM20-GFP-TRP1 / RIM20-GFP-TRP1* | “ | |
| **SH5848, SH5849** | *MATa / MAT ade2 / ade2 can1:ADE2:CAN1 / can1:ADE2:CAN1 his3-11,15 / his3-11,15 leu2-3,112 / leu2-3,112 lys2(3'del):HIS3:lys2(5'del) / LYS2 trp1-1 / trp1-3' ura3-1 / ura3-1 ime2GFPTRP1 / ime2GFPTRP1* Yep351(*LEU2*) | | “ |
| **SH5850, SH5851** | *MATa / MAT ade2 / ade2 can1:ADE2:CAN1 / can1:ADE2:CAN1 his3-11,15 / his3-11,15 leu2-3,112 / leu2-3,112 lys2(3'del):HIS3:lys2(5'del) / LYS2 TRP1 / trp1-3' URA3+ / ura3-1 ime2GFPTRP1 / ime2GFPTRP1* pS303 *(2-IME1, LEU2)* | | “ |
| **SH5863, SH4829** | *MATa / MAT ade2 / ade2 can1:ADE2:CAN1 / can1:ADE2:CAN1 his3-11,15 / his3-11,15 leu2-3,112 / leu2-3,112 lys2(3'del):HIS3:lys2(5'del) / LYS2 TRP1 / trp1-3' ura3-1 / ura3-1 rlm1::LEU / rlm1::LEU* pS778 (*UASRlm1-LacZ*, *URA3)* | “ | |
| **SH5865, SH5866** | *MATa / MAT ade2 / ade2 can1:ADE2:CAN1 / can1:ADE2:CAN1 his3-11,15 / his3-11,15 / leu2-3,112 / LEU2+ lys2(3'del):HIS3:lys2(5'del) / LYS2 TRP1 / trp1-3' ura3-1 / ura3-1 ime1ime1 rim101LEU2 rim101LEU2* | | “ |
| **SH5867, SH5868** | *MATa / MAT ade2 / ade2 can1:ADE2:CAN1 / can1:ADE2:CAN1 his3-11,15 / his3-11,15 LEU2+ / leu2-3,112 lys2(3'del):HIS3:lys2(5'del) / LYS2 TRP1 / trp1-3' ura3-1 / ura3-1 IME1+/ prIME1-LacZURA* | | “ |
| **SH5875, SH6106** | *MATa / MAT ade2 / ade2 can1:ADE2:CAN1 / can1:ADE2:CAN1 his3-11,15 / his3-11,15 leu2-3,112 / leu2-3,112 lys2(3'del):HIS3:lys2(5'del) / LYS2 TRP1 / trp1-3' ura3-1 / ura3-1 rlm1::LEU / rlm1::LEU IME1+/ prIME1* mCherry*(URA3)* | “ | |
| **SH5900, SH3830** | *MATa / MAT ade2 / ade2 can1:ADE2:CAN1 / can1:ADE2:CAN1 his3-11,15 / his3-11,15 LEU2+ / leu2-3,112 lys2(3'del):HIS3:lys2(5'del) / LYS2 TRP1 / trp1-3' ura3-1 / ura3-1 ime1/ prIME1-LacZ(URA3)* | “ | |
| **SH5904, SH5440** | *MATa / MAT ade2 / ade2 can1:ADE2:CAN1 / can1:ADE2:CAN1 his3-11,15 / his3-11,15 leu2-3,112 / leu2-3,112 lys2(3'del):HIS3:lys2(5'del) / LYS2 TRP1 / trp1-3' ura3-1 / ura3-1 prIME1-mCherry-URA3 / ime1* pUASRlm1-LacZ (*URA3*) | “ | |
| **SH6034, SH6035** | *MATa / MAT ade2 / ade2 can1:ADE2:CAN1 / can1:ADE2:CAN1 his3-11,15 / his3-11,15 leu2-3,112 / LEU2 lys2(3'del):HIS3:lys2(5'del) / LYS2 trp1-1 / TRP1 ura3-1 / ura3-1 rim101LEU2 / rim101LEU2 prIME1-LacZURA/ IME1+* | | “ |
| **SH6054, SH6055 1** | *MATa / MAT ade2 / ade2 can1:ADE2:CAN1 / can1:ADE2:CAN1 his3-11,15 / his3-11,15 LEU2 / leu2-3,112 lys2(3'del):HIS3:lys2(5'del) / LYS2 trp1-1 / trp1-3' ura3-1 / ura3-1 RLM+ / rlm1::LEU IME1 / prIME1-mCherry-URA3 RIM20-GFP-TRP1 / RIM20-GFP-TRP1* | | “ |
| **SH6062, SH6086** | *MATa / MAT ade2 / ade2 can1:ADE2:CAN1 / can1:ADE2:CAN1 his3-11,15 / his3-11,15 leu2-3,112 / leu2-3,112 lys2(3'del):HIS3:lys2(5'del) / LYS2 TRP1 / trp1-3' ura3-1 / ura3-1 slt2::LEU / slt2::LEU* pS778 (UASRlm1-LacZ, *URA3)* | “ | |
| **SH6104, SH6177** | *MATa / MAT ade2 / ade2 can1:ADE2:CAN1 / can1:ADE2:CAN1 his3-11,15 / his3-11,15 leu2-3,112 / leu2-3,112 lys2(3'del):HIS3:lys2(5'del) / LYS2 trp1-1 / trp1-3' ura3-1 / ura3-1 rlm1LEU2 / rlm1LEU2 slt2::URA3 / slt2::URA3 IME1+/ prIME1-LacZURA* | “ | |
| **SH6105** | *MATa / MAT ade2 / ade2 can1:ADE2:CAN1 / can1:ADE2:CAN1 his3-11,15 / his3-11,15 leu2-3,112 / leu2-3,112 lys2(3'del):HIS3:lys2(5'del) / LYS2 trp1-1 / trp1-3' ura3-1 / ura3-1 slt2::TRP1 / slt2::LEU2 prIME1-LacZURA/IME1+* | “ | |
| **SH6108** | *MATa / MAT ade2 / ade2 can1:ADE2:CAN1 / can1:ADE2:CAN1 his3-11,15 / his3-11,15 leu2-3,112 / LEU2 lys2(3'del):HIS3:lys2(5'del) / LYS2 trp1-1 / trp1-3' ura3-1 / ura3-1 RIM20-GFP-TRP1 / RIM20-GFP-TRP1* pS778 (UASRlm1-LacZ, *URA3)* | “ | |
